# Supplementary material
Source: publisher site journal article supplement (https://www.dovepress.com/article/326204)
Supplement: Supplementary file 1 [file get_supplementary_file.php]

Table S1. univariate and multivariate Logistic regression analysis for critical illness among COVID-19 patients

| Variables | univariate Logistic regression analysis OR (95%CI) | P value | multivariate Logistic regression analysis OR (95%CI) | P value |
| --- | --- | --- | --- | --- |
| Sex(male) | 2.039(1.373,3.029) | <0.001 |  |  |
| Age, years | 1.053(1.039,1.067) | <0.001 | 1.031(1.014, 1.049) | <0.001 |
| Respiratory rate (breath/min) | 1.158(1.110,1.208) | <0.001 | 1.063(1.009, 1.120) | 0.022 |
| Fever | 1.655(1.068, 2.563) | 0.024 |  |  |
| Unconsciousness | 60.922(13.173,281.748) | <0.001 | 40.078(5.992, 268.061) | <0.001 |
| Chronic heart disease | 2.630(1.554,4.453) | <0.001 |  |  |
| chronic neural disease | 3.258(1.054,10.069) | 0.04 |  |  |
| Hypertension | 1.852(1.247,2.750) | 0.002 |  |  |
| Platelet counts, ×109/L | 0.995(0.993,0.998) | 0.001 |  |  |
| Lymphocyte counts, ×109/L | 0.137(0.085,0.222) | <0.001 | 0.352(0.204, 0.607) | <0.001 |
| Neutrophil counts, ×109/L | 1.285(1.210,1.365) | <0.001 |  |  |
| Fibrinogen, g/L | 1.03(1.006,1.055) | 0.015 |  |  |
| Total bilirubin, μ mol/L | 1.048(1.027,1.069) | <0.001 | 1.030(1.001, 1.060) | <0.001 |
| BAR, mg/g | 1.620(1.471,1.784) | <0.001 | 1.319(1.183, 1.471) | <0.001 |

COVID-19: coronavirus disease 2019; critical illness: admitted into intensive care unit, invasive mechanical ventilation or death; OR: odds ratio; 95%CI: 95% confidence interval; BAR: blood urea nitrogen to serum albumin ratio.

Among these 24 variables identified from univariate analysis, the systolic blood pressure was excluded because it could be affected by hypertension; the albumin and BUN were excluded due to the inclusion of BAR; the dyspnea and wheeze were excluded due to its relationship with respiratory rate; the white blood cell was excluded because it depends on lymphocyte and neutrophil hugely. Meanwhile, the relationships between critical illness and arthralgia, stomachache, eosinophils, monocyte have been rarely reported. Therefore, only 14 variables were included into multivariate Logistic regression analysis to avoid overfitting.
